# Supplementary material for: Method to measure the size-resolved real part of aerosol refractive index
Source: Copernicus journal article supplement (doi:10.5194/amt-2018-399), 2018-11-27
Supplement: Supplementary file [file amt-2018-399-AC1-supplement.zip]

# Method to measure the size-resolved real part of aerosol refractive index using differential mobility analyzer in tandem with single particle soot photometer

Gang Zhao<sup>1</sup>, Weilun Zhao<sup>1</sup>, Chunsheng Zhao<sup>1\*</sup>

<sup>1</sup> Department of Atmospheric and Oceanic Sciences, School of Physics, Peking University, Beijing, China

\*Correspondence to: Chunsheng Zhao (zcs@pku.edu.cn)

## Abstract

Knowledge on the refractive index of ambient aerosol can help reduce the uncertainties in estimating aerosol radiative forcing. A new method is proposed to retrieve the size-resolved real part of ~~RI~~refractive index (RRI). Main principle of deriving the RRI is measuring the scattering intensity by single particle soot photometer of size-selected aerosol. This method is validated by a series of calibration experiments using the components of known RRI. The retrieved size-resolved RRI cover a wide range from 200 nm to 450 nm with uncertainty less than 0.02. Measurements of the size resolved ~~real part of the aerosol refractive index~~RRI can improve the understanding of the aerosol radiative effects.

## 1 Introduction

Aerosols exert significant influence on the earth energy budget by scattering and absorbing radiation (Ramanathan and Carmichael, 2008). There still remain great uncertainties when estimating the aerosol effective radiative forcing (RF) (Ghan and Schwartz, 2007) and an accurate estimation of the aerosol optical properties can help reduce the RF variations. The optical properties of the ambient aerosol particles are determined by their particle size and complex refractive index (RI,  $m=n+ki$ ) (Bohren and Huffman, 2007; Levoni et al., 1997). Despite that the ambient aerosol particle size distribution can be measured with high accuracy (Wiedensohler et al., 2012), an accurate measurement of the ambient aerosol RI remains challenging. The RI is also widely used in remote sensing (Redemann et al., 2000; Dubovik, 2002; Zhao et al., 2017) and atmospheric modelling (Ghan and Schwartz, 2007; Kuang et al., 2015) because the aerosol single scattering albedo (SSA) and aerosol scattering phase function are highly related with the RI. At the same time, a small uncertainty in the real part of the RI (RRI) can lead to great uncertainties when estimating the aerosol RF. Zarzana et al. (2014) ~~finds-found~~ that a variation of 0.003 in RRI can lead to uncertainties of 1% in RF for non-

带格式的: 字体: 倾斜

absorbing ammonium sulfate particles. Moise et al. (2015) ~~estimates-estimated~~ that the RF ~~will-would~~ increase 12% when the RRI varied~~s~~ from 1.4 to 1.5. Valenzuela et al. (2018) ~~reported that the uncertainties in RF is estimated to be 7% when the aerosol RRI varied by 0.1,also reports an uncertainty of 7% with the uncertainties of RRI of 0.1 in RRI.~~ Therefore, it is pressing that the uncertainties of the RI be reduced when estimating the RF.

Many methods were proposed to derive the RRI. The RRI can be estimated by linear volume average of the known aerosol chemical components by

$$n = \sum_i f_i n_i \quad (1)$$

where  $f_i$  and  $n_i$  is the volume fraction and known partial refractive index of  $i$ th component (Wex et al., 2002;Hand and Kreidenweis, 2002;Hänel, 1968;Liu and Daum, 2008). The aerosol RRI can also be calculated by partial molar refraction approach (Stelson, 1990;Hu et al., 2012) which is essentially consistent with the linear volume method (Liu and Daum, 2008). The ambient aerosol RRI can be derived by synthetically using the radiative transfer calculations and the ground-based solar extinction and scattering measurements (Wendisch and Hoyningen-Huene, 1994, 1992). Sorooshian et al. (2008) developed a method to measure the aerosol RRI based on the differential mobility analyzer (DMA) and an optical particle counters. The RRI ~~is-could be~~ retrieved from the known particle size from the DMA and the aerosol scattering intensity from the Optical Particle Counter (OPC) for aerosol particles larger than 500 nm. The Scanning Mobility Particle Sizer (SMPS) and OPC ~~is-was~~ used in combination to derive the RRI by aligning the particle size distributions in the instrument overlap regions (Hand and Kreidenweis, 2002;Vratolis et al., 2018). The aerosol effective RRI ~~is-was~~ also retrieved by applying Mie scattering theory to the aerosol particle number size distribution, aerosol bulk scattering coefficient and aerosol absorbing coefficient data (Cai et al., 2011;Liu and Daum, 2000). Spindler et al. (2007) retrieved the aerosol RRI value by using the cavity ring-down spectroscopy to measuring the scattering and absorbing properties of bulk aerosols. Eidhammer et al. (2008)) measured the light scattering at different angles and retrieved the RRI. Similarly, the aerosol RRI ~~is-was~~ retrieved by measuring the aerosol phase function (Barkey et al., 2007). Recently, a method by using the single particle mass spectrometry ~~is-was~~ proposed to measure the aerosol RRI (Zhang et al., 2015). At the same time, aerosol time-of-flight mass spectrometer ~~is-was~~ proved to be capable of measuring the aerosol RRI (Moffet et al., 2008). The aerosol RRI can also be retrieved from the Mie spectroscopy by using the optical tweezers in the laboratory (Shepherd et al., 2018).

60 —Up to now, there is no information in the literature of the size-resolved ambient aerosol RRI(Ebert  
61 et al., 2004;Kandler et al., 2007;Ebert et al., 2002) over the diameter range between 200nm and 500nm  
62 where the aerosol scattering coefficients contributes to the total scattering coefficients most (Tao et al.,  
63 2017;Kuang et al., 2018). All the instruments mentioned above can only measure the total equivalent  
64 aerosol RRI or aerosol RRI at a given diameter. However,

65 Many studies show that aerosol of different diameters shares different properties such as shape  
66 (Zhang et al., 2016;Peng et al., 2016), density (Qiao et al., 2018), aerosol hygroscopicity (Wang et al.,  
67 2017) and most importantly, the chemical components (Liu et al., 2014;Hu et al., 2012). Thus, there  
68 might be significant variations in the aerosol RRI for aerosols of different diameters because the  
69 aerosol RRI is highly related to the aerosol density (Liu and Daum, 2008) and chemical components  
70 (Stelson, 1990). On the other way round, information of the size-resolved aerosol RRI can help to  
71 study the chemical information and the aging process of aerosols among different diameters. Therefore,  
72 measurement of the size-resolved aerosol RRI is necessary.

73 Up to now, there are few information in the literature of the size-resolved ambient aerosol RRI  
74 (Ebert et al., 2004;Kandler et al., 2007;Ebert et al., 2002). Traditionally, the size-resolved ambient  
75 aerosols RRI are estimated by measuring the molar fraction or volume fraction of main aerosol  
76 chemical compositions. However, the influence of organic component on the aerosol RRI is ignored.  
77 The organic component contributes more than 20% of the total aerosol component in the North China  
78 Plain (Hu et al., 2012;Liu et al., 2014). At the same time, RRI of the organic aerosol changes  
79 significantly between 1.36 and 1.66 (Moise et al., 2015). Ignoring the organic component may lead to  
80 significantly uncertainties when estimating the aerosol RRI. There were no technique, to our  
81 knowledge, that directly measures the size-resolved aerosol optical properties and derives the size-  
82 resolved aerosol RRI.

83 In this study, a novel method is proposed to measure the size-resolved ambient aerosol RRI by  
84 using a DMA in tandem with a single particle soot photometer (SP2). The principle of the system is  
85 using the SP2 to measure the scattering properties of size-selected aerosols. Knowing the aerosol  
86 diameter and corresponding scattering intensity, the size-resolved aerosol RRI can be retrieved based  
87 on the Mie scattering theory. This proposed method can measure the ambient aerosol RRI over a wide  
88 size range with high accuracy. The measurement system is employed in a field campaign in the North  
89 China Plain and the corresponding results are further discussed.

带格式的: 缩进: 首行缩进: 0.74 厘米



119 and  $r_2$  is the inner radius of the annular space. The transfer function refers to the probability that a  
 120 particle with a certain electrical mobility can pass through the DMA. For a given  $V$ , the transfer  
 121 function is triangular-shaped, with the peaking value of 100% and a half width (HW) of

$$122 \quad \Delta Z_p = Z_p \frac{Q_a}{Q_{sh}} \quad (3)$$

123 The aerosol  $Z_p$ , which is highly related to the aerosols diameter ( $D_p$ ) and the number of elementary  
 124 charges on the particle ( $n$ ), is defined as:

$$125 \quad Z_p = \frac{neC(D_p)}{3\pi\mu D_p} \quad (4)$$

126 where  $e$  is the elementary charge;  $\mu$  is the gas viscosity coefficient,  $C(D_p)$  is the Cunningham  
 127 slip correction that is defined by:

$$128 \quad C = 1 + \frac{2\tau}{D_p} (1.142 + 0.558e^{-\frac{0.999D_p}{2\tau}}) \quad (5)$$

129 where  $\tau$  is the gas mean free path.

130 Based on the discussion above, the aerosols that pass through the DMA with the same  $Z_p$ , can  
 131 have different  $D_p$  and different elementary charges.

### 132 2.3 SP2

133 The SP2 is a widely used instrument that can measure the optical properties of every single particle.  
 134 The measurement principle and instrumental setup of the SP2 have been discussed in detail previously  
 135 (Stephens et al., 2003; Schwarz et al., 2006) and will be briefly described here. When the sample  
 136 aerosol particles pass through the continuous Nd:YAG laser beam at 1064 nm with the circulating  
 137 power about 1 mW/cm<sup>2</sup> in the cavity, eight sensors distributed at four directions are synchronously  
 138 detecting the emitted or scattered light by using avalanche photo-detector (APD) at different angles  
 139 (45° and 135°). For each direction, the two APDs sample the same signal with different sensitivities to  
 140 get a wider measurement range. The low gain channels are less sensitive to the measured signal and  
 141 can be used to measure the stronger signal of larger particles. In accordance, the high gain channels  
 142 are more sensitive to the measured signal, and can be used to measure the weaker signal of smaller  
 143 particles. The optical head of the SP2 is shown schematically in fig. 1(b).

144 In this study, we utilize signals from four channels of the SP2: two of them measure the scattering  
 145 signals and another two measure the incandescent light between 350 nm and 800 nm. The peak height  
 146 ( $H$ ) of the incandescence signals is used to infer whether the sampled aerosol contains the black carbon

带格式的: 字体: 倾斜  
 带格式的: 字体: 倾斜  
 带格式的: 字体: 倾斜

带格式的: 字体: 倾斜  
 带格式的: 字体: 倾斜  
 带格式的: 字体: 倾斜  
 带格式的: 字体: 倾斜  
 带格式的: 字体: 倾斜

带格式的: 字体: 倾斜  
 带格式的: 字体: 倾斜  
 带格式的: 字体: 倾斜  
 带格式的: 字体: 倾斜  
 带格式的: 字体: 倾斜

带格式的: 字体: 倾斜

带格式的: 字体: 倾斜  
 带格式的: 字体: 倾斜  
 带格式的: 字体: 倾斜  
 带格式的: 字体: 倾斜  
 带格式的: 字体: 倾斜

带格式的: 字体: 倾斜

147 (BC). If the  $H$  of the incandescence signal is larger than 500, the sample aerosol contains the BC and  
148 the scattering signals should deviate from the signals of pure scattering aerosol. Those sample aerosols  
149 are ~~ruled out~~not considered when dealing with the aerosol scattering signals. This is achieved by just  
150 studying the signals when the particle are recognized as pure scattering particle.

带格式的: 字体: 倾斜

151 Despite that some aerosol particles are internally mixed with a small BC core, whose  
152 incandescence signal is below the detection threshold of SP2, we will demonstrate that these particles  
153 have little influence on the retrieved aerosol RRI. At the same time, there are some weakly absorbing  
154 organic components that absorb light intensity in the near infrared range, which were termed as brown  
155 carbon (BrC). These BrC components have ignorable influence on the retrieving of aerosol RRI, which  
156 will be discussed in detail in section 4.2. Thus, the imaginary part of complex refractive index is set to  
157 be zero in the following discussion.

### 158 3 Methodology

#### 159 3.1 Scattering ~~strength~~intensity measured by the SP2

160 From fig. 1(b), the APDs of the SP2 receive signals that were scattered by the sampled aerosols  
161 ~~from the directions~~in a certain small range at  $45^\circ$  and  $135^\circ$ . Thus, the scattering intensity ( $S$ ) measured  
162 by the APD can be expressed as:

$$163 S = C_0 \cdot I_0 \cdot \sigma \cdot (PF_{45^\circ} + PF_{135^\circ}) \quad (6),$$

带格式的: 字体: 倾斜

164 where  $I_0$  is the laser's intensity;  $\sigma$  is the scattering coefficient of the sampled aerosol,  $PF_{45^\circ}$  and  
165  $PF_{135^\circ}$  are scattering phase function at  $45^\circ$  and  $135^\circ$  respectively of the sampled aerosols; and  $C_0$   
166 is a constant that is determined by the distance from the aerosol to the APD and the area of the APD.

带格式的: 字体: 倾斜

带格式的: 字体: 倾斜

带格式的: 字体: 倾斜

带格式的: 字体: 倾斜

167 The scattering intensity of the aerosol is recorded as the  $H$  of the scattering signals ~~by in~~ SP2. The  
168 following calibration studies show that the scattering intensity  $S$  is highly related the  $H$  measured by  
169 SP2. Therefore, the SP2 can be used as a powerful tool to measure the scattering signals of the  
170 sampled aerosols, thus determining the corresponding scattering intensity, and the influence of the BC  
171 on the aerosol scattering properties can be avoided.

带格式的: 字体: 倾斜

带格式的: 字体: 倾斜

172 Based on the Mie scattering theory, the scattering coefficient  $\sigma$  can be calculated by integrating  
173 the square of scattering intensity function  $Q(\theta, x, RRI)$  from  $0^\circ$  to  $180^\circ$ . Angle  $\theta$  is defined as the  
174 angle between the light incident direction and scattering light direction. The size parameter  $x$  is defined  
175 as  $x = \frac{\pi D_p}{\lambda}$ , where  $\lambda$  is the light incident wavelength. The scattering phase function can be directly

176 derived from  $S(\theta, x, m)$ , too. Therefore, the  $\sigma$ ,  $PF_{45^\circ}$  and  $PF_{135^\circ}$  in equation 6 are determined by  
177 the size  $D_p$  and RRI of the aerosol. The amount of scattering signals from the sample aerosol varies  
178 with the aerosol diameter  $D_p$  and RRI of the aerosol (Bohren and Huffman, 2007). The scattering  
179 intensity at different aerosol diameters and RRI is calculated based on equation (6) and shown in fig.

180 2. The  $C_0$  is assumed to be 1 here. From fig. 2, we can see that the aerosol scattering intensity  
181 increases homogeneously-monotonously with the increasing aerosol RRI at a given  $D_p$ , which makes  
182 it possible to retrieve the aerosol RRI with given when the  $D_p$  and the scattering intensity are known.

183 Bridging the scattering  $H$  values measured by the SP2 scattering channel and the scattering  
184 intensity  $S$  defined by equation 6 is achieved by calibrating the SP2 with ammonium sulfate. The  
185 instrument setup of the calibration procedure is the same as that described in section 2.1.2.4. The  
186 diameters of the aerosols passing through the DMA are manually changed from 100 to 450 nm with a  
187 step of 10 nm. For each diameter, the scattering  $H$  value and incandescence signal of every particle are  
188 analyzed. When calibrating, there is no aerosol whose incandescence signal exceeds 1000. (This value  
189 depends on the stability of the instrument and working conditions. It can be different for different  
190 instrument), which means that the SP2 works stably and the incandescence signal channel can well  
191 distinguish the BC containing aerosols. With the calibration, the relationship between the measured  $H$   
192 and theoretically calculated  $S$  can be determined.

193 After the calibration, the size-resolved RRI can be retrieved with known aerosol diameter selected  
194 by DMA and the corresponding aerosol scattering  $H$  values measured by SP2.

195 The procedure of retrieving the RRI are summarized as follows: (1) measuring the scattering  $H$   
196 values at a given  $D_p$ ; (2) transferring the  $H$  into to  $S$  by the established relationship from calibration;  
197 (3) calculating the refractive index with the given  $D_p$  and  $S$  by using equation 6.

### 198 3.2 Multiple Charging

199 Fig. S12 gives the aerosols scattering  $H$  probability distribution under different aerosol diameters.  
200 For each diameter, the distributions of the scattering  $H$  may have more than one mode for both the high  
201 gain and low gain channels. The following discussions would give explanation about the multiple  
202 mode distributions of  $H$ .

203 For each mode, the number of recorded aerosol particles at a given  $H$  is fit by the log-normal  
204 distribution function:

带格式的: 字体: 倾斜

$$N(H) = \frac{N_0}{\sqrt{2\pi}\log(\sigma_g)} \cdot \exp\left[-\frac{\log(H)-\log(H_0)}{2\log^2(\sigma_g)}\right] \quad (7)$$

Where  $\sigma_g$  is the geometric standard deviation;  $H_0$  is the geometric standard mean value of  $H$  and  $N_0$  is the number concentrations for a peak mode. The geometric standard deviation is highly related to the half width of the transfer function (equation 3). The  $H_0$  and the  $H_p$  is discussed below in detail further used for discussion in the following part.

The  $H_p$  values of corresponding to different elementary charges each mode at different diameters are labeled with different markers in fig. 23. The  $\sigma_g$  is fitted to be a small range at  $1.182 \pm 0.02$  for different modes and different aerosol diameters. In the following discussion, we conclude that the different  $H_p$  values in fig. 3 represent that the aerosols are charged with different number of elementary charges. Based on the Mie scattering theory (Bohren and Huffman, 2007), the scattering intensity increases with increasing  $D_p$ , which imply that the  $H_0$  of the singly charged aerosol should increase with the increment of  $D_p$ . Thus, the black square markers in fig. 2-3 represent the aerosols that are singly charged. At the same time, the relationships between the  $H_p$  and  $D_p$  can be interpolated.

Other colored markers represent that the aerosols have more than one charge. We calculated the corresponding diameter ( $\tilde{D}_p$ ) of the aerosols that share the same  $Z_p$  but different charges at the given with those particles that have diameter of  $D_p$  with one charge by the DMA ( $\tilde{D}_p$ ). Then the corresponding  $H_0$  at  $\tilde{D}_p$  are calculated. Then the relationship between  $H_0$  and  $D_p$  is shown in dashed line in fig. 2 3(a). From fig. 2 3(a), the calculated  $H_0$  shows good consistence with the measured  $H_0$ .

From the discussion above, we conclude that the SP2 can only detect those ammonium sulfate aerosols with the diameter larger than 160 nm. However, the ambient aerosol RRI is always lower than that of ammonium sulfate (Liu and Daum, 2008), thus the lower detecting limit of the ambient scattering aerosols should be larger than 160 nm. The measured  $H_0$  of the SP2 scattering low gain channel signals are shown in fig. 3(b) S2. From fig. 3(b) S2, the same results can be deduced as those of the high gain channel signals.

Fig. 4(a) gives the relationships between the calculated scattering intensity and the SP2 aerosol scattering  $H_0$  at different diameters. When calculating the scattering intensity, the RRI value of ammonium sulfate is set to be 1.521 (Flores et al., 2009), and the  $C_0$  in equation 6 is set to be unity. We can see that the aerosol scattering intensity shows good consistence with the peak height

带格式的: 字体: 倾斜



( $R^2=0.9992$ ), which to some extent reflect the high accuracy of our proposed method. When regressing the scattering intensity on the measured peak height, the value 0.36 were obtained for the slope, which means that the scattering intensity can be calculated by multiplying the peak height with a factor of 0.36.

~~Furthermore, the RRI of the scattering aerosol at a given diameter can be retrieved using the corresponding scattering  $H$ .~~

### 3.3 Validation of the calibration

Ammonium chloride is used to validate the method of deriving the RRI from SP2. The RRI value of ammonium chloride is 1.642 (Lide, 2006). The scattering  $H$  of the ammonium chloride under different diameters are measured and analyzed. Fig. 4(b) shows the comparison between the measured scattering high gain peak heights and the theoretical peak heights at different aerosols diameters. Results show that the measured peak heights and the calculated ones are well correlated with  $R^2=0.9994$ , which means that the DMA and SP2 can be used to derived the aerosol RRI with high accuracy.

Fig. S3-S2 gives the corresponding results of the scattering low gain channel. In fig. S3S2, the relationship between the aerosol scattering peak height of the low gain channel and the scattering strength-intensity is determined. At the same time, the comparison between the measured peak height and the calculated peak height shows good consistence too.

## 4 Results and Discussion

### 4.1 Field Measurements

Figure 5 shows the measured average probability distribution of the ambient size-resolved RRI and the measured mean PNSD over two hours during the measurement. From fig. 5, we can see that the derived RRI is  $1.46 \pm 0.02$  and doesn't vary significantly with diameter between 199 nm and 436 nm.

The measured aerosol PNSD during the measurement has a maximum of  $26400 \text{ \#/cm}^3$  at 107 nm. The mass concentration of the BC measured by the SP2 is  $6.31 \text{ \mu g/m}^3$ . Based on the measured PNSD and the measured RRI, the size distribution of the scattering coefficient is calculated based on the Mie scattering theory. The results in fig. 5 show that the measured RRI diameter range covers most of the aerosol that contributes significantly a fraction of 0.63 to the aerosol scattering properties with-The

带格式的: 字体: 倾斜

263 integrated scattering coefficient at 385 Mm<sup>-1</sup>. Thus, the derived size-resolved RRI of this range is  
264 representative of the ambient aerosols scattering properties.

265 **4.2 Uncertainty analysis**

266 **4.2.1 Uncertainties from SP2**

267 The factors that influence the accuracy of retrieving RRI include the aerosols scattering H  
268 measured by SP2 and the aerosol diameter selected by DMA.

269 The uncertainties of the selected diameter by DMA ~~is~~are well characterized based on equation 2  
270 and 3. The uncertainties from the DMA transfer function can be avoided by fitting the scattering H  
271 using the log-normal distribution function. However, the uncertainties of the measured H from the SP2  
272 remain unknown. The half width~~HW~~ ( $\Delta Z_p/Z_p$ ) of the transfer function is 0.1 times the scanning  
273 diameter, which means that the geometric standard deviation of the aerosol PNSD selected by the  
274 DMA is estimated to be 1.102. At the same time, the measured geometric standard deviation of the  
275 measured H mode by SP2 is 1.182. Thus, the additional broadening by the H distribution is 1.073,  
276 which implies that the geometric standard deviation of the measured H from the SP2 is estimated to  
277 be 1.073, whose corresponding uncertainties is 6.8%.

278 The uncertainties of the retrieved RRI to the variations in the measured H are analyzed ~~using the~~  
279 ~~Mie scattering theory~~. Firstly, we calculated the theoretical scattering intensity that can be measured  
280 by the SP2 for a given aerosol diameter and RRI. The scattering intensity are changed by  $\pm 6.8\%$  and  
281 the corresponding RRI can be derived using the given aerosol diameter and changed scattering intensity.  
282 Finally, the derived RRI are compared with the given aerosol RRI. The uncertainties are analyzed for  
283 different aerosol diameter and different RRI. and ~~the~~ The corresponding results are shown in fig. 6. The  
284 variations in RRI increase with the increment of RRI but decrease with the increment of the Dp. For

285 most ambient aerosols, the RRI ranges from 1.4 to 1.5 and corresponds to a variation in RRI of 0.015.  
286 Table 1 lists the retrieved ammonium chloride RRI under different diameters. The absolute  
287 difference between the retrieved RRI and theoretical values is always smaller than 0.02 regardless of  
288 the particle diameter, which means that the measured RRI is in line with the theoretical one. Thus, we  
289 conclude that the uncertainty of the retrieved RRI is within 0.02 due to the uncertainties of SP2  
290 measurement.

291 **4.2.2 Uncertainties due to BC exists**

带格式的: 字体: 加粗

带格式的: 字体: 倾斜

带格式的: 字体: 加粗

带格式的: 字体: 加粗

292 There are some particles with a small soot core and the incandescence signal is below the detection  
293 threshold of SP2. The derived aerosol RRI should be influenced by small soot core. Uncertainties  
294 might be resulted when deriving the RRI for these BC-contained aerosols. With the calibration of the  
295 SP2 with Aquadag soot particles, we concluded that the SP2 can't detect the soot particles lower than  
296 80 nm, which is shown in detail in supplementary material in section S3.

297 We derived the aerosol equivalent refractive index when the aerosol have BC cores lower than 80  
298 nm with two steps. The scattering strength of the BC-containing aerosols are first calculated based on  
299 Mie scattering theory. Then the scattering strength are used to deriving the equivalent refractive index  
300 with assuming that the BC-containing aerosols are pure scattering aerosols.

301 Monte Carlo simulations were applied to investigate the influence of the BC core on the retrieved  
302 ambient aerosol RRI. Firstly, aerosol with diameter between 200 nm and 500 nm was chosen. Then  
303 the core diameter are random determined lower than 80 nm. The core diameters flow the log-normal  
304 distribution with the mean core diameter of 120 nm (Raatikainen et al., 2017). When calculating the  
305 scattering strength, the complex refractive index of the core  $1.8+0.54i$  (Zhao et al., 2018) is used. The  
306 complex refractive of the shell adopts the measured mean values  $(1.46+0i)$  during the field  
307 measurements. The scattering strength can be calculated with the above information. With the  
308 calculated scattering strength, the equivalent real part of the refractive index (RRI) can be derived with  
309 assuming that the aerosols are pure scattering aerosols. If the core diameter is 0, then the derived  
310 aerosol equivalent aerosol RRI should be 1.46.

311 For each aerosol diameter, the Monte Carlo simulations were conducted for 10000 times. Fig. 7(a)  
312 gives the retrieved aerosol equivalent RRI at different diameters. Results show that the retrieved  
313 aerosol equivalent RRI are larger than 1.46 for all of the given aerosol diameters. When the aerosols  
314 have BC core, the scattering strength are larger than that of pure scattering aerosols with the same  
315 aerosol diameter. The derived mean equivalent RRI tend to be closer to 1.46 when the aerosol diameter  
316 are larger, where the BC core contributes less and the influence of the BC core are be smaller. The  
317 derived mean aerosol equivalent RRI is 1.47 and 1.462 at 200 nm and 500 nm respectively. At the  
318 same time, the uncertainties associated with the equivalent RRI are larger when the aerosol diameter  
319 are smaller. We conclude that the uncertainties associated with BC core are smaller than 0.01 when  
320 the aerosol diameter are larger than 250 nm. The maximum of the difference of the derived RRI is  
321 0.02.

带格式的: 字体: (默认) Times New Roman  
带格式的: 缩进: 首行缩进: 0.74 厘米

带格式的: 字体: (默认) Times New Roman

带格式的: 定义网格后不调整右缩进, 不调整西文与中文之间的空格, 不调整中文和数字之间的空格

带格式的: 字体: (默认) Times New Roman

带格式的: 字体: (默认) Times New Roman

### 4.2.3 Uncertainties from BrC

There are some BrCs that absorb the light intensity in the near infrared range. The imaginary part of the refractive index at a given wavelength  $\lambda$  ( $k_\lambda$ ) of the BrC can be calculated as:

$$k_{\lambda 1} = k_{\lambda 2} \times \left(\frac{\lambda_2}{\lambda_1}\right)^w \quad (8)$$

Where  $w$  is defined by mass of BC to organic aerosol ratio (R) (Saleh et al., 2015) with:

$$w = \frac{0.21}{R+0.07} \quad (9)$$

Based on the work of Saleh et al. (2015), the  $k_{550}$  can be expressed as:

$$k_{550} = 0.016 \times \log_{10}(R) + 0.04 \quad (10)$$

The values R ranges between 0.09 and 0.35 for different types of aerosols (Saleh et al., 2015).

Based on equation (8), (9) and (10), the  $k_{1024}$  ranges between 0.01 and 0.024. The maximum value 0.024 is used for further analysis.

The uncertainties of the retrieved RRI when ignoring the effect of BrC are analyzed. Firstly, The scattering light intensity at a given diameter with a refractive index of  $1.46 + 0.024i$  is calculated using the Mie model. Then the corresponding RRI are retrieved using given diameter and the calculated light intensity with assumption that these are pure scattering aerosols. The retrieved aerosol RRI values for different aerosol diameter are shown in fig. 7(b). For the light absorbing particles, their scattering light intensity is smaller than that of the pure scattering particles with the same diameter and RRI. Therefore, the retrieved aerosol RRI is underestimated for most of the conditions. The differences between the given RRI value (1.46) and retrieved RRI value are lower than 0.006 for all of the diameters as shown in fig. 7(b). The BrC component has little influence on the retrieved aerosol RRI.

### 4.2.4 Overall of the uncertainties

Monte Carlo simulations were conducted to study the influence of the above three uncertainty sources. Four steps are involved in the Monte Carlo simulations. First, the core diameter of an aerosol particle at a given diameter are randomly given with the core diameter flowing the log-normal distribution with the mean core diameter of 120 nm (Raatikainen et al., 2017). The refractive index of the core is set to be the same as that in section 4.2.2. The RRI of the shell uses the measured mean value 1.46. The imaginary part of the shell is determined randomly with a mean value of 0.023. Second, the light scattering intensity can be calculated using the Mie model and the information in step one. Then the light scattering intensity was randomly changed with uncertainties of 6.8%. Finally, the

带格式的: 字体: 加粗

带格式的: 居中, 定义网格后不调整右缩进, 不调整西文与中文之间的空格, 不调整中文和数字之间的空格

带格式的: 字体: 倾斜

带格式的: 定义网格后不调整右缩进, 不调整西文与中文之间的空格, 不调整中文和数字之间的空格

带格式的: 居中, 缩进: 首行缩进: 0.74 厘米, 定义网格后不调整右缩进, 不调整西文与中文之间的空格, 不调整中文和数字之间的空格

带格式的: 居中, 定义网格后不调整右缩进, 不调整西文与中文之间的空格, 不调整中文和数字之间的空格

带格式的: 定义网格后不调整右缩进, 不调整西文与中文之间的空格, 不调整中文和数字之间的空格

changed light scattering intensity are used to derive the aerosol RRI with the given diameter and assumption that the particles are pure scattering particles.

The aerosol diameters were changed from 200 nm to 500 nm, and the simulations were conducted for 10000 times for each diameter. The overall uncertainties are shown in fig. 7(c). The uncertainties from SP2 instrument measurement don't lead to bias of the retrieved aerosol RRI. When the aerosol diameter is lower than 300 nm, the influence of the BC core is more important than the influence of BrC. The retrieved RRI tend to be overestimated when the aerosol is lower than 300 nm. When the aerosol diameter is larger than 300 nm, the influence of BrC domains and the retrieved aerosol RRI are underestimated. However, the bias caused by BC and BrC are all the way lower than 0.01. For most of the conditions, the retrieved aerosol RRI are within the range of  $1.46 \pm 0.02$ . Thus, we conclude that the uncertainty of the retrieved RRI is 0.02 with considering all of the factors.

## 5 Conclusions

—Knowledge on the microphysical properties of ambient aerosol is import for better evaluating their radiative forcing. The aerosol RRI is a key factor that determines the aerosol scattering properties. In this study, a new method to measure the ambient aerosol RRI is developed by synthetically using a DMA in tandem with a SP2. This method can continuously measure the size-resolved RRI over a wide range between 198 nm and 426 nm ~~with an accuracy of 0.02~~. At the same time, it is free from the influence of the BC containing aerosols.

The basic principle of measuring the size-resolved RRI is to select the aerosols at a certain diameter by the DMA and measure the corresponding scattering intensity by the SP2. The relationship between the aerosols scattering intensity and the peak height of the scattering signal channels are determined by calibrating the SP2 using ammonium sulfate (RRI=1.521).

The method is validated by ~~using measuring the size-resolved RRI of~~ the ammonium chloride with the RRI value of 1.642 as sample aerosol and the corresponding derived ~~size resolved RRI is~~ value is  $1.642 \pm 0.02$ .

There are three factors that influence the accuracy of derived aerosol RRI. The measured scattering intensity by SP2 has an uncertainty of 0.68%, which can lead to the uncertainties of the derived RRI values less than 0.15. There are some particles with a small soot core and the incandescence signal is below the detection threshold of SP2. The light scattering intensity of these particles increases

380 compared with that of the pure scattering particles with the same aerosol diameters. The retrieved  
381 aerosol RRI values can be overestimated by up to 0.02. Some BrCs absorb the light intensity in the  
382 near infrared range. The corresponding scattering intensity is weaker than that of pure scatter particles  
383 for the same diameter and the retrieved aerosol RRI value can be underestimated by up to 0.006. Based  
384 on Monte Carlo simulations, the uncertainty of the retrieved RRI is 0.02 with considering all of the  
385 factors.

386 This instrument is employed at a field measurement at the AERONET PKU station, the size-  
387 resolved RRI of the ambient aerosols is 1.46 and doesn't show significant variation among the diameter.  
388 The corresponding aerosol diameter range, which can be detected by SP2 to derive the RRI, covers  
389 most of the aerosol scattering. Thus, the derived size-resolved RRI of this range can be used as a good  
390 representative of the ambient aerosols scattering properties.

391  
392 **Data availability.** The measurement data involved in this study are available upon request to the  
393 authors.

394  
395 **Author contributions.** Gang Zhao and Chunsheng Zhao designed the experiments; Gang Zhao and  
396 Weilun Zhao conducted the measurements; Chunsheng Zhao and Gang Zhao discussed the results and  
397 wrote the manuscript.

398  
399 **Competing interests.** The authors declare that they have no conflict of interest.

400  
401 **Acknowledgments.** This work is supported by the National Key R&D Program of China  
402 (2016YFC020000:Task 5) and the National Natural Science Foundation of China (41590872).

403  
404  
405 Barkey, B., Paulson, S. E., and Chung, A.: Genetic Algorithm Inversion of Dual Polarization Polar  
406 Nephelometer Data to Determine Aerosol Refractive Index, *Aerosol Sci. Technol.*, 41, 751-760,  
407 10.1080/02786820701432640, 2007.

408 Bohren, C. F., and Huffman, D. R.: Absorption and Scattering by a Sphere, in: Absorption and  
409 Scattering of Light by Small Particles, Wiley-VCH Verlag GmbH, 82-129, 2007.

Cai, Y., Montague, D. C., and Deshler, T.: Comparison of measured and calculated scattering from surface aerosols with an average, a size-dependent, and a time-dependent refractive index, *Journal of Geophysical Research*, 116, 10.1029/2010jd014607, 2011.

Dick, W. D., Ziemann, P. J., and McMurry, P. H.: Multiangle Light-Scattering Measurements of Refractive Index of Submicron Atmospheric Particles, *Aerosol Sci. Technol.*, 41, 549-569, 10.1080/02786820701272012, 2007.

Dubovik, O.: Variability of absorption and optical properties of key aerosol types observed in worldwide locations, *J.atmos.sci*, 59, 590-608, 2002.

Ebert, M., Weinbruch, S., Rausch, A., Gorzawski, G., Helas, G., Hoffmann, P., and Wex, H.: Complex refractive index of aerosols during LACE 98#x2010; as derived from the analysis of individual particles, *Journal of Geophysical Research: Atmospheres*, 107, LAC 3-1-LAC 3-15, 10.1029/2000jd000195, 2002.

Ebert, M., Weinbruch, S., Hoffmann, P., and Ortner, H. M.: The chemical composition and complex refractive index of rural and urban influenced aerosols determined by individual particle analysis, *Atmospheric Environment*, 38, 6531-6545, 10.1016/j.atmosenv.2004.08.048, 2004.

Eidhammer, T., Montague, D. C., and Deshler, T.: Determination of index of refraction and size of supermicrometer particles from light scattering measurements at two angles, *Journal of Geophysical Research*, 113, 10.1029/2007jd009607, 2008.

Flores, J. M., Trainic, M., Borrmann, S., and Rudich, Y.: Effective broadband refractive index retrieval by a white light optical particle counter, *Phys Chem Chem Phys*, 11, 7943-7950, 10.1039/b905292e, 2009.

Ghan, S. J., and Schwartz, S. E.: Aerosol Properties and Processes: A Path from Field and Laboratory Measurements to Global Climate Models, *Bulletin of the American Meteorological Society*, 88, 1059-1084, 10.1175/bams-88-7-1059, 2007.

Hand, J. L., and Kreidenweis, S. M.: A New Method for Retrieving Particle Refractive Index and Effective Density from Aerosol Size Distribution Data, *Aerosol Sci. Technol.*, 36, 1012-1026, 10.1080/02786820290092276, 2002.

Hänel, G.: REAL PART OF MEAN COMPLEX REFRACTIVE INDEX AND MEAN DENSITY OF SAMPLES OF ATMOSPHERIC AEROSOL PARTICLES, *Tellus*, 20, 371-&, 10.3402/tellusa.v20i3.10016, 1968.

440 Hu, M., Peng, J., Sun, K., Yue, D., Guo, S., Wiedensohler, A., and Wu, Z.: Estimation of size-resolved  
 441 ambient particle density based on the measurement of aerosol number, mass, and chemical size  
 442 distributions in the winter in Beijing, *Environ Sci Technol*, 46, 9941-9947, 10.1021/es204073t, 2012.  
 443 Kandler, K., Benker, N., Bundke, U., Cuevas, E., Ebert, M., Knippertz, P., Rodríguez, S., Schütz, L.,  
 444 and Weinbruch, S.: Chemical composition and complex refractive index of Saharan Mineral Dust at  
 445 Izaña, Tenerife (Spain) derived by electron microscopy, *Atmospheric Environment*, 41, 8058-8074,  
 446 10.1016/j.atmosenv.2007.06.047, 2007.  
 447 Knutson, E. O., and Whitby, K. T.: Aerosol classification by electric mobility: apparatus, theory, and  
 448 applications, *Journal of Aerosol Science*, 6, 443-451, [https://doi.org/10.1016/0021-8502\(75\)90060-9](https://doi.org/10.1016/0021-8502(75)90060-9),  
 449 1975.  
 450 Kuang, Y., Zhao, C. S., Tao, J. C., and Ma, N.: Diurnal variations of aerosol optical properties in the  
 451 North China Plain and their influences on the estimates of direct aerosol radiative effect, *Atmos. Chem.*  
 452 *Phys.*, 15, 5761-5772, 10.5194/acp-15-5761-2015, 2015.  
 453 Kuang, Y., Zhao, C. S., Zhao, G., Tao, J. C., Xu, W., Ma, N., and Bian, Y. X.: A novel method for  
 454 calculating ambient aerosol liquid water content based on measurements of a humidified nephelometer  
 455 system, *Atmospheric Measurement Techniques*, 11, 2967-2982, 10.5194/amt-11-2967-2018, 2018.  
 456 Levoni, C., Cervino, M., Guzzi, R., and Torricella, F.: Atmospheric aerosol optical properties: a  
 457 database of radiative characteristics for different components and classes, *Appl Opt*, 36, 8031-8041,  
 458 1997.  
 459 Lide, D. R.: Handbook of Chemistry and Physics, 86th Edition Edited(National Institute of Standards  
 460 and Technology), *Journal of the American Chemical Society*, 128, 5585-5585, 10.1021/ja059868l,  
 461 2006.  
 462 Liu, H. J., Zhao, C. S., Nekat, B., Ma, N., Wiedensohler, A., van Pinxteren, D., Spindler, G., Müller,  
 463 K., and Herrmann, H.: Aerosol hygroscopicity derived from size-segregated chemical composition and  
 464 its parameterization in the North China Plain, *Atmospheric Chemistry and Physics*, 14, 2525-2539,  
 465 10.5194/acp-14-2525-2014, 2014.  
 466 Liu, Y., and Daum, P. H.: THE EFFECT OF REFRACTIVE INDEX ON SIZE DISTRIBUTIONS  
 467 AND LIGHT SCATTERING COEFFICIENTS DERIVED FROM OPTICAL PARTICLE  
 468 COUNTERS ☆, *Journal of Aerosol Science*, 31, 945-957, 2000.



469 Liu, Y., and Daum, P. H.: Relationship of refractive index to mass density and self-consistency of  
 470 mixing rules for multicomponent mixtures like ambient aerosols, *Journal of Aerosol Science*, 39, 974-  
 471 986, 10.1016/j.jaerosci.2008.06.006, 2008.

472 Moffet, R. C., Qin, X., Rebotier, T., Furutani, H., and Prather, K. A.: Chemically segregated optical  
 473 and microphysical properties of ambient aerosols measured in a single-particle mass spectrometer,  
 474 *Journal of Geophysical Research*, 113, 10.1029/2007jd009393, 2008.

475 Moise, T., Flores, J. M., and Rudich, Y.: Optical properties of secondary organic aerosols and their  
 476 changes by chemical processes, *Chemical Reviews*, 115, 4400-4439, 2015.

477 Peng, J., Hu, M., Guo, S., Du, Z., Zheng, J., Shang, D., Levy Zamora, M., Zeng, L., Shao, M., Wu, Y.-  
 478 S., Zheng, J., Wang, Y., Glen, C. R., Collins, D. R., Molina, M. J., and Zhang, R.: Markedly enhanced  
 479 absorption and direct radiative forcing of black carbon under polluted urban environments,  
 480 *Proceedings of the National Academy of Sciences*, 113, 4266-4271, 10.1073/pnas.1602310113, 2016.

481 Qiao, K., Wu, Z., Pei, X., Liu, Q., Shang, D., Zheng, J., Du, Z., Zhu, W., Wu, Y., Lou, S., Guo, S.,  
 482 Chan, C. K., Pathak, R. K., Hallquist, M., and Hu, M.: Size-resolved effective density of submicron  
 483 particles during summertime in the rural atmosphere of Beijing, China, *Journal of Environmental*  
 484 *Sciences*, 10.1016/j.jes.2018.01.012, 2018.

485 Raatikainen, T., Brus, D., Hooda, R. K., Hyvärinen, A.-P., Asmi, E., Sharma, V. P., Arola, A., and  
 486 Lihavainen, H.: Size-selected black carbon mass distributions and mixing state in polluted and clean  
 487 environments of northern India, *Atmospheric Chemistry and Physics*, 17, 371-383, 10.5194/acp-17-  
 488 371-2017, 2017.

489 Ramanathan, V., and Carmichael, G.: Global and regional climate changes due to black carbon, *Nature*  
 490 *Geoscience*, 1, 221-227, 10.1038/ngeo156, 2008.

491 Redemann, J., Turco, R. P., Liou, K. N., Russell, P. B., Bergstrom, R. W., Schmid, B., Livingston, J.  
 492 M., Hobbs, P. V., Hartley, W. S., Ismail, S., Ferrare, R. A., and Browell, E. V.: Retrieving the vertical  
 493 structure of the effective aerosol complex index of refraction from a combination of aerosol in situ and  
 494 remote sensing measurements during TARFOX, *Journal of Geophysical Research: Atmospheres*, 105,  
 495 9949-9970, 10.1029/1999jd901044, 2000.

496 Saleh, R., Marks, M., Heo, J., Adams, P. J., Donahue, N. M., and Robinson, A. L.: Contribution of  
 497 brown carbon and lensing to the direct radiative effect of carbonaceous aerosols from biomass and  
 498 biofuel burning emissions, *Journal of Geophysical Research: Atmospheres*, 120, 10,285-210,296,

doi:10.1002/2015JD023697, 2015.

Schwarz, J. P., Gao, R. S., Fahey, D. W., Thomson, D. S., Watts, L. A., Wilson, J. C., Reeves, J. M., Darbeheshti, M., Baumgardner, D. G., Kok, G. L., Chung, S. H., Schulz, M., Hendricks, J., Lauer, A., Kärcher, B., Slowik, J. G., Rosenlof, K. H., Thompson, T. L., Langford, A. O., Loewenstein, M., and Aikin, K. C.: Single-particle measurements of midlatitude black carbon and light-scattering aerosols from the boundary layer to the lower stratosphere, *Journal of Geophysical Research*, 111, 10.1029/2006jd007076, 2006.

Shepherd, R. H., King, M. D., Marks, A. A., Brough, N., and Ward, A. D.: Determination of the refractive index of insoluble organic extracts from atmospheric aerosol over the visible wavelength range using optical tweezers, *Atmospheric Chemistry and Physics*, 18, 5235-5252, 10.5194/acp-18-5235-2018, 2018.

Sorooshian, A., Hersey, S., Brechtel, F. J., Corless, A., Flagan, R. C., and Seinfeld, J. H.: Rapid, Size-Resolved Aerosol Hygroscopic Growth Measurements: Differential Aerosol Sizing and Hygroscopicity Spectrometer Probe (DASH-SP), *Aerosol Sci. Technol.*, 42, 445-464, 10.1080/02786820802178506, 2008.

Spindler, C., Riziq, A. A., and Rudich, Y.: Retrieval of Aerosol Complex Refractive Index by Combining Cavity Ring Down Aerosol Spectrometer Measurements with Full Size Distribution Information, *Aerosol Sci. Technol.*, 41, 1011-1017, 10.1080/02786820701682087, 2007.

Stelson, A. W.: Urban aerosol refractive index prediction by partial molar refraction approach, *Environ.sci.technol*, 24:11, 1676-1679, 1990.

Stephens, M., Turner, N., and Sandberg, J.: Particle identification by laser-induced incandescence in a solid-state laser cavity, *Appl Opt*, 42, 3726-3736, 2003.

Tao, J., Zhao, C., Kuang, Y., Zhao, G., Shen, C., Yu, Y., Bian, Y., and Xu, W.: A New Method for Calculating Number Concentrations of Cloud Condensation Nuclei Based on Measurements of A Three-wavelength Humidified Nephelometer System, *Atmospheric Measurement Techniques Discussions*, 1-19, 10.5194/amt-2017-193, 2017.

Valenzuela, A., Reid, J. P., Bzdek, B. R., and Orr-Ewing, A. J.: Accuracy required in measurements of refractive index and hygroscopic response to reduce uncertainties in estimates of aerosol radiative forcing efficiency, *Journal of Geophysical Research: Atmospheres*, 10.1029/2018jd028365, 2018.

Vratolis, S., Fetfatzis, P., Argyrouli, A., Papayannis, A., Müller, D., Veselovskii, I., Bougiatioti, A.,

529 Nenes, A., Remoundaki, E., Diapouli, E., Manousakas, M., Mylonaki, M., and Eleftheriadis, K.: A  
530 new method to retrieve the real part of the equivalent refractive index of atmospheric aerosols, *Journal*  
531 *of Aerosol Science*, 117, 54-62, 10.1016/j.jaerosci.2017.12.013, 2018.

532 Wang, Y., Wu, Z., Ma, N., Wu, Y., Zeng, L., Zhao, C., and Wiedensohler, A.: Statistical analysis and  
533 parameterization of the hygroscopic growth of the sub-micrometer urban background aerosol in  
534 Beijing, *Atmospheric Environment*, 10.1016/j.atmosenv.2017.12.003, 2017.

535 Wendisch, M., and Hoyningen-Huene, W. V.: Optically equivalent refractive index of atmospheric  
536 aerosol particles, *Huene*, 65, 1992.

537 Wendisch, M., and Hoyningen-Huene, W. V.: Possibility of refractive index determination of  
538 atmospheric aerosol particles by ground-based solar extinction and scattering measurements,  
539 *Atmospheric Environment*, 28, 785-792, 1994.

540 Wex, H., Neusüß, C., Wendisch, M., Stratmann, F., Koziar, C., Keil, A., Wiedensohler, A., and Ebert,  
541 M.: Particle scattering, backscattering, and absorption coefficients: An in situ closure and sensitivity  
542 study, *Journal of Geophysical Research: Atmospheres*, 107, LAC 4-1-LAC 4-18,  
543 10.1029/2000jd000234, 2002.

544 Wiedensohler, A., Birmili, W., Nowak, A., Sonntag, A., Weinhold, K., Merkel, M., Wehner, B., Tuch,  
545 T., Pfeifer, S., Fiebig, M., Fjåraa, A. M., Asmi, E., Sellegri, K., Depuy, R., Venzac, H., Villani, P., Laj,  
546 P., Aalto, P., Ogren, J. A., Swietlicki, E., Williams, P., Roldin, P., Quincey, P., Hüglin, C., Fierz-  
547 Schmidhauser, R., Gysel, M., Weingartner, E., Riccobono, F., Santos, S., Gröning, C., Faloon, K.,  
548 Beddows, D., Harrison, R., Monahan, C., Jennings, S. G., O'Dowd, C. D., Marinoni, A., Horn, H. G.,  
549 Keck, L., Jiang, J., Scheckman, J., McMurry, P. H., Deng, Z., Zhao, C. S., Moerman, M., Henzing, B.,  
550 de Leeuw, G., Löschau, G., and Bastian, S.: Mobility particle size spectrometers: harmonization of  
551 technical standards and data structure to facilitate high quality long-term observations of atmospheric  
552 particle number size distributions, *Atmospheric Measurement Techniques*, 5, 657-685, 10.5194/amt-  
553 5-657-2012, 2012.

554 Zarzana, K. J., Cappa, C. D., and Tolbert, M. A.: Sensitivity of Aerosol Refractive Index Retrievals  
555 Using Optical Spectroscopy, *Aerosol Sci. Technol.*, 48, 1133-1144, 10.1080/02786826.2014.963498,  
556 2014.

557 Zhang, G., Bi, X., Han, B., Qiu, N., Dai, S., Wang, X., Sheng, G., and Fu, J.: Measurement of aerosol  
558 effective density by single particle mass spectrometry, *Science China Earth Sciences*, 59, 320-327,

559 10.1007/s11430-015-5146-y, 2015.

560 Zhang, Y., Zhang, Q., Cheng, Y., Su, H., Kecorius, S., Wang, Z., Wu, Z., Hu, M., Zhu, T., Wiedensohler,  
561 A., and He, K.: Measuring the morphology and density of internally mixed black carbon with SP2 and  
562 VTDMA: new insight into the absorption enhancement of black carbon in the atmosphere,  
563 Atmospheric Measurement Techniques, 9, 1833-1843, 10.5194/amt-9-1833-2016, 2016.

564 Zhao, G., Zhao, C., Kuang, Y., Tao, J., Tan, W., Bian, Y., Li, J., and Li, C.: Impact of aerosol  
565 hygroscopic growth on retrieving aerosol extinction coefficient profiles from elastic-backscatter lidar  
566 signals, Atmospheric Chemistry and Physics, 17, 12133-12143, 10.5194/acp-17-12133-2017, 2017.

567 Zhao, G., Zhao, C., Kuang, Y., Bian, Y., Tao, J., Shen, C., and Yu, Y.: Calculating the aerosol  
568 asymmetry factor based on measurements from the humidified nephelometer system, Atmospheric  
569 Chemistry and Physics, 18, 9049-9060, 10.5194/acp-18-9049-2018, 2018.

570

571

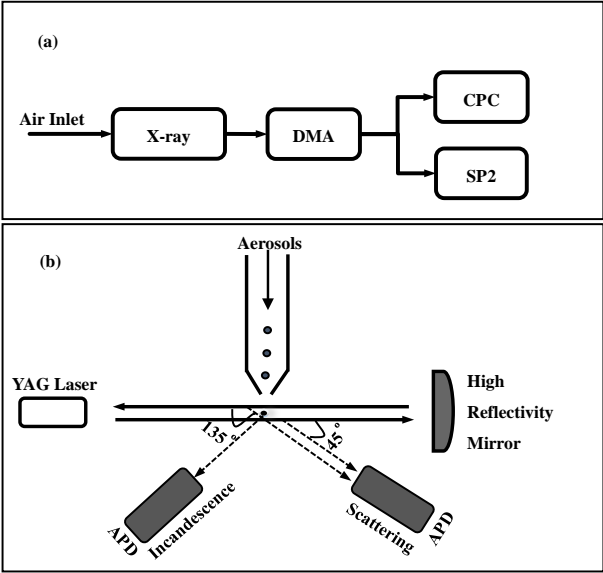

573 **Figure 1.** (a) Schematic of the measurement system. (b) Diagram of SP2 Chamber.

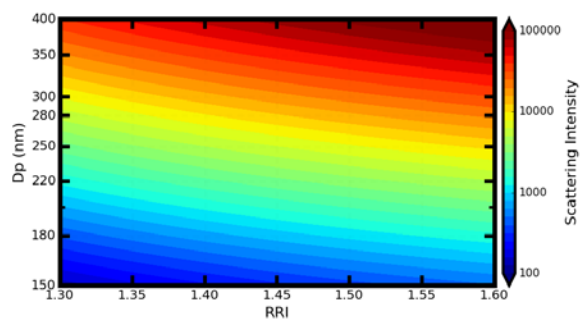

575 **Figure 2.** The distribution of the aerosols scattering ~~strength~~ intensity at different Dp and different  
576 RRI.  
577

578

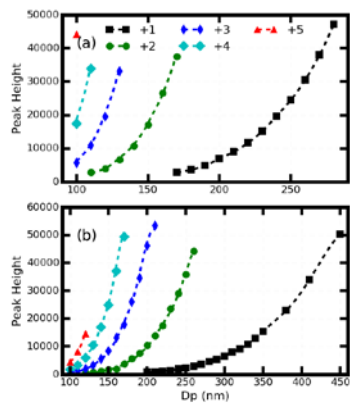

579 **Figure 3.** The geometric mean peak height for different diameters of the high gain channel. The  
580 markers gives the measured values and the dotted line shows the theoretically calculated value.  
581 Different colors represent the different number of elementary charges.

582

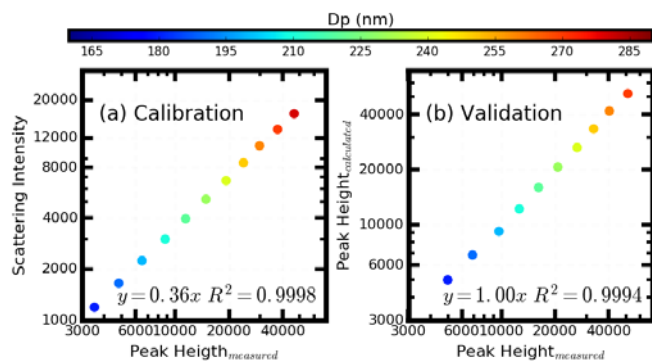

带格式的: 居中

**Figure 4.** (a) the relationship between the scattering peak height from the SP2 high gain scattering channel when calibrating by using the ammonia sulfate and (b) the comparison between the measured scattering peak height from SP2 high gain scattering channel using the ammonia chloride and the calculated scattering peak height using the Mie scattering theory. Different colors represents the results at different diameters.



590

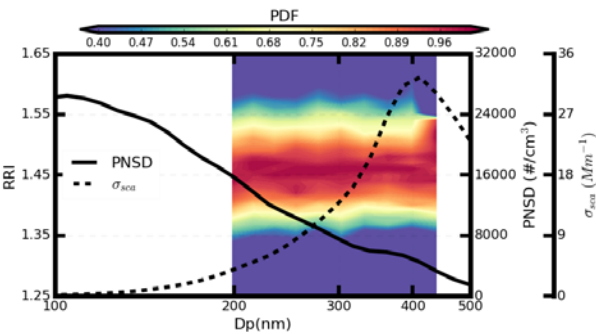

591 **Figure 5.** The measured probability of the size-resolved RRI (the filled color), the measured mean  
592 PNSD (the full line) and the mean scattering size distribution (the dotted line).

593

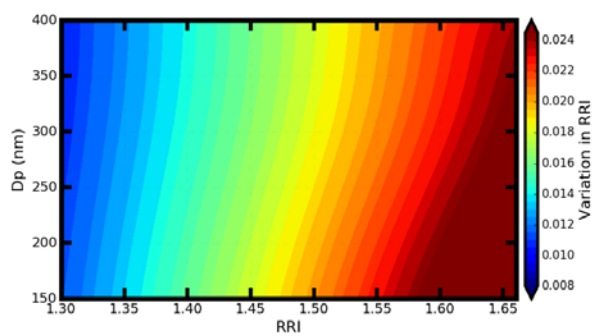

594 **Figure 6.** The variation in RRI for different kinds of aerosols that have different diameters and different  
 595 RRI.  
 596

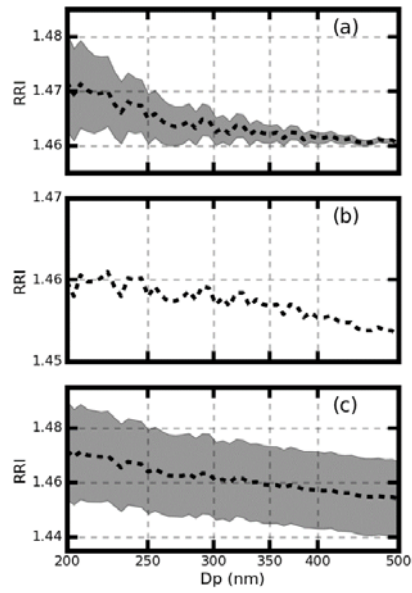

**Figure 7.** The retrieved aerosol RRI at different aerosol diameter. The filled color represents the 5<sup>th</sup> and 95<sup>th</sup> percentiles.

601  
602

603 **Tabel 1.** The retrieved RRI and the absolute difference between the retrieved RRI and the theoretical  
604 RRI for different ammonia chloride diameters.

| Dp(nm)     | 160   | 170   | 180   | 190   | 200   | 210   | 220   | 230   | 240   | 250   | 260   | 270   |
|------------|-------|-------|-------|-------|-------|-------|-------|-------|-------|-------|-------|-------|
| RRI        | 1.654 | 1.650 | 1.651 | 1.643 | 1.656 | 1.645 | 1.633 | 1.626 | 1.634 | 1.626 | 1.624 | 1.625 |
| Difference | 0.012 | 0.008 | 0.009 | 0.001 | 0.012 | 0.003 | 0.009 | 0.016 | 0.008 | 0.016 | 0.018 | 0.017 |

605
